# Supplementary material for: Conditions, pathogenesis, and progression of diabetic kidney disease and early decliner in Japan
Source: PubMed Central journal article supplement — BMJ Open Diabetes Res Care. 2020 Mar 22;8(1):e000902. doi: 10.1136/bmjdrc-2019-000902 (PMC7206926; doi:10.1136/bmjdrc-2019-000902), 2020-03-22
Supplement: bmjdrc-2019-000902supp002.pdf [file bmjdrc-2019-000902supp002.pdf]

Supplemental Table S1. Baseline variables sorted by albuminuria and eGFR in type 1 diabetes  
(n = 184)

|                                      | no DKD<br>(n=134)    | Low eGFR†<br>group (n=9) | Albuminuria†<br>† group (n=27) | Low eGFR and<br>albuminuria<br>group<br>(n=14) | Overall<br>(N=184<br>)  |
|--------------------------------------|----------------------|--------------------------|--------------------------------|------------------------------------------------|-------------------------|
| Male                                 | 60 (45%)             | 4 (44%)                  | 14 (52%)                       | 8 (57%)                                        | 86<br>(47%)             |
| Age (years)                          | 50 (37-62)           | 67 (63-72) **            | 57 (48-62)                     | 55 (47-66)                                     | 53 (40-<br>64)          |
| BMI (kg/m <sup>2</sup> )             | 22 (20-23)           | 25 (21-28) *             | 22 (20-25)                     | 24 (22-25)                                     | 22 (20-<br>24)          |
| Serum creatinine<br>(mg/dL)          | 0.64 (0.55-<br>0.76) | 1 (0.82-1.27)<br>***     | 0.69 (0.56-<br>0.81)           | 1.31 (0.96-<br>2.08) ***                       | 0.68<br>(0.56-<br>0.81) |
| eGFR<br>(mL/min/1.73m <sup>2</sup> ) | 87 (75-100)          | 50 (43-54) ***           | 77 (70-90) *                   | 40 (27-56) ***                                 | 82 (69-<br>97)          |
| Total cholesterol<br>(mg/dL)         | 194 (176-<br>213)    | 204 (176-<br>216)        | 192 (163-204)                  | 185 (166-227)                                  | 193<br>(174-<br>212)    |
| LDL cholesterol<br>(mg/dL)           | 106<br>(89-118)      | 113<br>(107-118)         | 92<br>(83-111)                 | 98<br>(78-107)                                 | 103<br>(86-<br>118)     |
| HDL cholesterol<br>(mg/dL)           | 69 (57-80)           | 68 (44-78)               | 60 (51-74)                     | 58 (49-67) *                                   | 66 (55-<br>79)          |
| Triglycerides<br>(mg/dL)             | 74 (53-104)          | 109 (70-166)<br>*        | 85 (75-162) **                 | 98 (74-194) *                                  | 80 (58-<br>122)         |
| HbA1c§ (%)                           | 7.6 (6.8-<br>8.2)    | 6.9 (6.4-7.7)            | 8.5 (7.7-10.2)<br>***          | 7.3 (6.7-7.5)                                  | 7.6 (6.8-<br>8.3)       |
| Uric acid (mg/dL)                    | 4.2 (3.5-5)          | 5.1 (3.8-6.2)            | 4.6 (3.5-6.5)                  | 6.4 (5.6-7.9) ***                              | 4.5 (3.5-<br>5.2)       |
| Systolic blood<br>pressure (mmHg)    | 124 (113-<br>134)    | 128 (119-<br>139)        | 132 (126-148)<br>*             | 130 (114-138)                                  | 126<br>(114-<br>135)    |
| Diastolic blood<br>pressure (mmHg)   | 70 (66-79)           | 72 (70-74)               | 80 (62-88)                     | 76 (67-80)                                     | 71 (66-<br>80)          |
| History of<br>diabetic               | 11 (12%)             | 1 (17%)                  | 8 (53%) ***                    | 5 (50%) **                                     | 25<br>(20%)             |



Supplemental Table S2. Baseline variables sorted by albuminuria and eGFR in type 2 diabetes  
(n = 2,154)

|                                         | no DKD<br>(n=993)  | Low eGFR†<br>group<br>(n=266) | Albuminuria†<br>† group<br>(n=481) | Low eGFR<br>and<br>albuminuria<br>group<br>(n=414) | Overall<br>(N=2,154<br>) |
|-----------------------------------------|--------------------|-------------------------------|------------------------------------|----------------------------------------------------|--------------------------|
| Male                                    | 636 (64%)          | 164 (62%)                     | 314 (65%)                          | 268 (65%)                                          | 1382<br>(64%)            |
| Age (years)                             | 63 (54-70)         | 71 (65-76)<br>***             | 62 (54-69)                         | 66 (60-75) ***                                     | 65 (57-<br>72)           |
| BMI (kg/m <sup>2</sup> )                | 24 (22-27)         | 25 (23-28)                    | 25 (22-28)                         | 25 (23-28)                                         | 25 (22-<br>28)           |
| Serum creatinine<br>(mg/dL)             | 0.7 (0.6-<br>0.82) | 1.02 (0.88-<br>1.14) ***      | 0.71 (0.6-0.83)                    | 1.2 (1.03-1.6)<br>***                              | 0.8 (0.65-<br>0.98)      |
| eGFR<br>(mL/min/1.73m <sup>2</sup><br>) | 78 (70-91)         | 52 (46-56)<br>***             | 77 (68-90)                         | 44 (33-52) ***                                     | 70 (56-<br>83)           |
| Total cholesterol<br>(mg/dL)            | 181 (161-<br>206)  | 177 (156-<br>196) *           | 189 (166-213)<br>**                | 187 (162-217)<br>*                                 | 184 (161-<br>209) *      |
| LDL cholesterol<br>(mg/dL)              | 104<br>(85-124)    | 99<br>(79-115)**              | 104<br>(86-125)                    | 97<br>(81-115)**                                   | 102<br>(84-122)          |
| HDL cholesterol<br>(mg/dL)              | 51 (42-61)         | 50 (42-61)                    | 50 (42-60)                         | 49 (42-62)                                         | 50 (42-<br>61)           |
| Triglycerides<br>(mg/dL)                | 117 (83-<br>172)   | 115 (88-162)                  | 128 (88-182) **                    | 124 (93-183) *                                     | 120 (86-<br>175)         |
| HbA1c§ (%)                              | 7.1 (6.5-<br>7.9)  | 7 (6.5-7.5)                   | 7.5 (6.8-8.6)<br>***               | 6.9 (6.3-7.8)<br>**                                | 7.1 (6.5-<br>7.9)        |
| Uric acid<br>(mg/dL)                    | 5 (4.3-6)          | 5.8 (5-6.6)<br>***            | 5.2 (4.3-6.2) **                   | 6.1 (5.3-7.1)<br>***                               | 5.3 (4.5-<br>6.3)        |
| Systolic blood<br>pressure<br>(mmHg)    | 127 (118-<br>137)  | 126 (114-<br>138)             | 134 (121-146)<br>***               | 140 (126-152)<br>***                               | 130 (120-<br>142)        |
| Diastolic blood<br>pressure<br>(mmHg)   | 73 (67-81)         | 70 (64-76)<br>***             | 76 (69-84) ***                     | 73 (65-80)                                         | 73 (67-<br>81)           |
| History of<br>diabetic                  | 128 (23%)          | 43 (28%)                      | 136 (53%) ***                      | 209 (67%) ***                                      | 516<br>(41%)             |



Supplemental Table S3. The distribution of patients by eGFR and urinary albumin creatinine ratio (ACR) sorted by the type of diabetes

| <b>All patients</b>                    | ACR<30 (mg/gCr) | ≥ 30 (mg/gCr) | Total          |
|----------------------------------------|-----------------|---------------|----------------|
| eGFR ≥ 60 (mL/min/1.73m <sup>2</sup> ) | 1,155 (48%)     | 514 (22%)     | 1,669<br>(70%) |
| eGFR <60 (mL/min/1.73m <sup>2</sup> )  | 281 (12%)       | 435 (18%)     | 716 (30%)      |
| Total                                  | 1,436 (60%)     | 949 (40%)     | 2,385          |
| <b>Type 1 diabetes</b>                 |                 |               |                |
| eGFR ≥ 60 (mL/min/1.73m <sup>2</sup> ) | 134 (73%)       | 27 (15%)      | 161 (88%)      |
| eGFR <60 (mL/min/1.73m <sup>2</sup> )  | 9 (5%)          | 14 (8%)       | 23 (12%)       |
| Total                                  | 143 (78%)       | 41 (22%)      | 184            |
| <b>Type 2 diabetes</b>                 |                 |               |                |
| eGFR ≥ 60 (mL/min/1.73m <sup>2</sup> ) | 993 (50%)       | 481 (22%)     | 1,474<br>(68%) |
| eGFR <60 (mL/min/1.73m <sup>2</sup> )  | 266 (13%)       | 414 (19%)     | 680 (32%)      |
| Total                                  | 1,259 (58%)     | 895 (42%)     | 2,154          |
| n (%)                                  |                 |               |                |

Supplemental Table S4. Risk factors of DKD by category after exclusion of patients from 2 hospitals that performed renal biopsies for all participants



| Variables                       | Low eGFR group† |               | Albuminuria group†† |               | Low eGFR and albuminuria group |              |
|---------------------------------|-----------------|---------------|---------------------|---------------|--------------------------------|--------------|
|                                 | OR              | 95%CI         | OR                  | 95%CI         | OR                             | 95%CI        |
| Sex (female)                    | 1.37            | (0.81, 2.32)  | 0.98                | (0.64, 1.51)  | 2.00                           | (1.22, 3.29) |
| Age (by 10 years)               | 2.69            | (2.03, 3.58)  | 1.2                 | (1.01, 1.42)  | 1.89                           | (1.50, 2.40) |
| BMI (by 5 kg/m <sup>2</sup> )   | 1.31            | (0.95, 1.81)  | 1.23                | (0.98, 1.56)  | 1.32                           | (0.99, 1.77) |
| Total cholesterol (by 10 mg/dL) | 0.91            | (0.83, 0.997) | 0.93                | (0.86, 0.999) | 0.97                           | (0.90, 1.06) |
| HDL cholesterol (by 10 mg/dL)   | 0.99            | (0.81, 1.21)  | 1.00                | (0.86, 1.17)  | 0.99                           | (0.82, 1.18) |
| Triglyceride (by 10 mg/dL)      | 1               | (0.97, 1.04)  | 1.01                | (0.99, 1.04)  | 1.01                           | (0.97, 1.04) |
| HbA1c§ (%)                      | 1.05            | (0.81, 1.36)  | 1.30                | (1.11, 1.51)  | 0.80                           | (0.61, 1.03) |
| Uric acid (mg/dL)               | 1.83            | (1.48, 2.27)  | 1.11                | (0.95, 1.31)  | 2.07                           | (1.69, 2.53) |
| SBP (by 10 mmHg)                | -               | -             | 1.33                | (1.18, 1.50)  | 1.17                           | (1.02, 1.35) |
| DBP (by 10 mmHg)                | 1.06            | (0.83, 1.34)  | -                   | -             | -                              | -            |
| Diabetic retinopathy (yes/no)   | 1.23            | (0.72, 2.10)  | 2.17                | (1.46, 3.22)  | 3.45                           | (2.18, 5.48) |

§NGSP, National Glycohemoglobin Standardization Program.

† eGFR < 60 mL/min/1.73m<sup>2</sup> and normoalbuminuria (ACR < 30 mg/gCr)

†† ACR ≥ 30 mg/gCr and normal eGFR (≥ 60 mL/min/1.73m<sup>2</sup>)

Note. Logistic regression analysis with each DKD group in contradistinction to no DKD group in order to find related risk factors.

Supplemental Table S5. Risk factors of diabetes kidney disease by category with LDL cholesterol as a variable instead of total cholesterol

| Variables                        | Low eGFR group† |              | Albuminuria group†† |              | Low eGFR and albuminuria group |              |
|----------------------------------|-----------------|--------------|---------------------|--------------|--------------------------------|--------------|
|                                  | OR              | 95%CI        | OR                  | 95%CI        | OR                             | 95%CI        |
| Sex (female)                     | 1.19            | (0.72, 1.97) | 0.97                | (0.64, 1.48) | 1.72                           | (1.07, 2.75) |
| Age<br>(by 10 years)             | 2.71            | (2.06, 3.57) | 1.19                | (1.01, 1.41) | 1.85                           | (1.49, 2.30) |
| BMI<br>(by 5 kg/m <sup>2</sup> ) | 1.43            | (1.04, 1.96) | 1.28                | (1.02, 1.60) | 1.31                           | (1.00, 1.73) |
| LDL cholesterol<br>(by 10 mg/dL) | 0.96            | (0.87, 1.05) | 0.94                | (0.87, 1.01) | 0.98                           | (0.90, 1.06) |
| HDL cholesterol<br>(by 10 mg/dL) | 0.97            | (0.82, 1.14) | 0.95                | (0.83, 1.08) | 0.99                           | (0.86, 1.15) |
| Triglyceride<br>(by 10 mg/dL)    | 0.99            | (0.95, 1.02) | 1.01                | (0.98, 1.04) | 1.02                           | (0.99, 1.04) |
| HbA1c§ (%)                       | 1.02            | (0.80, 1.30) | 1.29                | (1.11, 1.51) | 0.76                           | (0.60, 0.98) |
| Uric acid (mg/dL)                | 1.86            | (1.51, 2.28) | 1.10                | (0.94, 1.29) | 2.01                           | (1.67, 2.43) |
| SBP (by 10 mmHg)                 | -               | -            | 1.31                | (1.16, 1.47) | 1.23                           | (1.08, 1.40) |
| DBP (by 10 mmHg)                 | 1.10            | (0.87, 1.38) | -                   | -            | -                              | -            |
| Diabetic retinopathy<br>(yes/no) | 1.18            | (0.70, 1.99) | 2.11                | (1.42, 3.13) | 3.68                           | (2.36, 5.75) |

§NGSP, National Glycohemoglobin Standardization Program.

† eGFR < 60 mL/min/1.73m<sup>2</sup> and normoalbuminuria (ACR < 30 mg/gCr)

†† ACR ≥ 30 mg/gCr and normal eGFR (≥ 60 mL/min/1.73m<sup>2</sup>)

Note. Logistic regression analysis with each DKD group in contradistinction to no DKD group in order to find related risk factors.

Supplemental Table S6. Medication information by diabetic kidney disease category

|                             | No DKD | Low eGFR group <sup>†</sup> | Albuminuria group <sup>††</sup> | Low eGFR and albuminuria group | Total   |
|-----------------------------|--------|-----------------------------|---------------------------------|--------------------------------|---------|
| Oral antidiabetic drugs (%) | 61%    | 70%                         | 76%                             | 65%                            | 65%     |
| P value                     | ref    | 0.15                        | 0.012                           | 0.86                           | (n=591) |
| Use insulin (%)             | 28%    | 34%                         | 39%                             | 47%                            | 33%     |
| P value                     | ref    | 0.24                        | 0.01                            | <0.0001                        | (n=302) |
| Antidyslipidemic drugs (%)  | 42%    | 52%                         | 60%                             | 70%                            | 50%     |
| P value                     | ref    | 0.051                       | <0.0001                         | <0.0001                        | (n=448) |
| Antihypertensive drugs (%)  | 35%    | 49%                         | 67%                             | 87%                            | 49%     |
| P value                     | ref    | 0.0059                      | <0.0001                         | <0.0001                        | (n=450) |
| RAAS inhibitors (%)         | 30%    | 45%                         | 59%                             | 78%                            | 44%     |
| P value                     | ref    | 0.0033                      | <0.0001                         | <0.0001                        | (n=400) |

<sup>†</sup> eGFR < 60 mL/min/1.73m<sup>2</sup> and normoalbuminuria (ACR < 30 mg/gCr)

<sup>††</sup> ACR ≥ 30 mg/gCr and normal eGFR (≥ 60 mL/min/1.73m<sup>2</sup>)

Note. P value contradicted with no DKD by chi-square test. The population varied according to the number of medication data.

Supplemental Table S7. Distribution of variables at baseline for each analysis

|                                   | Participants for DKD<br>prevalence<br>(n=2,385) | Participants for early<br>decliner<br>(n=2,761) |
|-----------------------------------|-------------------------------------------------|-------------------------------------------------|
| Sex (Male)                        | 1498 (63%)                                      | 1755 (64%)                                      |
| Age (Years)                       | 64 (55-71)†                                     | 66 (58-73)†                                     |
| Type for diabetes (Type 2)        | 2154 (91%)                                      | 2659 (98%)                                      |
| BMI (kg/m <sup>2</sup> )          | 24.4 (22-27)†                                   | 24 (22-27)†                                     |
| Total cholesterol (mg/dL)         | 185 (162-209)†                                  | 182 (160-205)†                                  |
| LDL cholesterol (mg/dL)           | 102 (84-121)†                                   | 101 (83-119)                                    |
| HDL cholesterol (mg/dL)           | 51 (43-63)†                                     | 52 (43-63)†                                     |
| Triglycerides (mg/dL)             | 116 (83-170)†                                   | 115 (82-169)†                                   |
| HbA1c§ (%)                        | 7.1 (6.5-8.0)†                                  | 7.1 (6.6-7.8)†                                  |
| Uric acid (mg/dL)                 | 5.2 (4.4-6.2)†                                  | 5.3 (4.5-6.2)†                                  |
| Systolic blood pressure (mmHg)    | 130 (119-142)†                                  | 128 (118-138)†                                  |
| Diastolic blood pressure (mmHg)   | 73 (66-81)†                                     | 72 (65-80)†                                     |
| eGFR (mL/min/1.73m <sup>2</sup> ) | 70 (56-85)†                                     | 70 (57-82)†                                     |

The values are expressed in n (%) or median (IQR)†

§NGSP, National Glycohemoglobin Standardization Program.

Supplemental Table S8. Yearly estimated glomerular filtration rate decrease classified by diabetes type and diabetic kidney disease category

|                                | Type 1 diabetes (n=196) |                                                         | Type 2 diabetes (n=2,299) |                                                         |
|--------------------------------|-------------------------|---------------------------------------------------------|---------------------------|---------------------------------------------------------|
|                                | n                       | eGFR decline rate*<br>(mL/min/1.73m <sup>2</sup> /year) | n                         | eGFR decline rate*<br>(mL/min/1.73m <sup>2</sup> /year) |
| no DKD                         | 139                     | -1.23<br>(-3.87 to 1.03)                                | 1,154                     | -1.68<br>(-4.59 to 0.24)                                |
| Low eGFR group†                | 14                      | 0.44<br>(-0.47 to 2.78)                                 | 337                       | -0.22<br>(-2.22 to 2.01)                                |
| Albuminuria group††            | 26                      | -2.18<br>(-4.34 to -0.35)                               | 454                       | -2.68<br>(-6.15 to -0.56)                               |
| Low eGFR and albuminuria group | 17                      | -1.73<br>(-3.16 to -0.22)                               | 354                       | -1.08<br>(-3.95 to 0.79)                                |

\* Median (IQR)

† eGFR < 60 mL/min/1.73m<sup>2</sup> and normoalbuminuria (ACR < 30 mg/gCr)

†† ACR ≥ 30 mg/gCr and normal eGFR (≥ 60 mL/min/1.73m<sup>2</sup>)

Note. Patients were excluded whose measurement intervals were within 3 months.

Supplemental Table S9. Baseline risk factors of eGFR decline on multiple regression analysis and the rapidly lowering group (Group 1) by trajectory analysis with LDL cholesterol as a variable instead of total cholesterol

| Variables                               | multiple regression analysis |                         | trajectory analysis |                         |
|-----------------------------------------|------------------------------|-------------------------|---------------------|-------------------------|
|                                         | Regression coefficient       | 95% confidence interval | Odds ratio          | 95% confidence interval |
| Sex (Female)                            | -0.063                       | -0.51, 0.38             | 1.32                | 0.99, 1.74              |
| Age (by 10 years)                       | -0.45                        | -0.64, -0.26            | 1.64                | 1.45, 1.87              |
| BMI (by 5 kg/m <sup>2</sup> )           | -0.04                        | -0.28, 0.19             | 0.97                | 0.89, 1.07              |
| LDL cholesterol (by 10 mg/dL)           | -0.016                       | -0.092, 0.060           | 1.01                | 0.96, 1.05              |
| HDL cholesterol (by 10 mg/dL)           | 0.10                         | -0.033, 0.24            | 0.95                | 0.87, 1.04              |
| Triglycerides (by 10 mg/dL)             | -0.029                       | -0.055, -0.0031         | 1.03                | 1.01, 1.05              |
| HbA1c§ (%)                              | -0.056                       | -0.24, 0.12             | 1.08                | 0.96, 1.20              |
| Uric acid (mg/dL)                       | 0.064                        | -0.13, 0.25             | 1.05                | 0.93, 1.18              |
| Systolic blood pressure (by 10 mmHg)    | -0.17                        | -0.29, -0.051           | 1.04                | 0.96, 1.12              |
| ACR (by 10 mg/gCr)                      | -0.019                       | -0.026, -0.011          | 1.01                | 1.01, 1.02              |
| eGFR (by 10 mL/min/1.73m <sup>2</sup> ) | -0.81                        | -0.98, -0.65            | 2.39                | 2.14, 2.68              |

§NGSP, National Glycohemoglobin Standardization Program.

Note. Calculated by multiple regression analysis as to yearly change of eGFR to identify the baseline risk factors weighting by the square of follow-up period.

Calculated by multiple logistic regression analysis in contradistinction to moderate lowering group (group2).

Supplemental Table S10. Posterior probability of each group calculated on trajectory analysis

| Mean values of posterior probability with each group |         |         |         |
|------------------------------------------------------|---------|---------|---------|
| Groups patients really belong to                     | Group 1 | Group 2 | Group 3 |
| Group 1                                              | 0.86    | 0.14    | 0.0006  |
| Group 2                                              | 0.055   | 0.88    | 0.070   |
| Group 3                                              | 0.00015 | 0.15    | 0.85    |



Supplemental Table S11. Risk factors of the gradually rising group (Group 3) by trajectory analysis

| Variables                              | Odds ratio | 95% confidence interval |
|----------------------------------------|------------|-------------------------|
| Sex (Female)                           | 1.19       | 0.88, 1.61              |
| Age (by 10 years)                      | 0.83       | 0.73, 0.94              |
| BMI (by 5 kg/m <sup>2</sup> )          | 0.997      | 0.95, 1.04              |
| Total cholesterol (by 10 mg/dL)        | 0.96       | 0.91, 1.00              |
| HDL cholesterol (by 10 mg/dL)          | 1.07       | 0.97, 1.20              |
| Triglycerides (by 10 mg/dL)            | 1.00       | 0.98, 1.02              |
| HbA1c§ (%)                             | 0.98       | 0.85, 1.13              |
| Uric acid (mg/dL)                      | 1.02       | 0.90, 1.15              |
| eGFR (by 10 mL/ml/1.73m <sup>2</sup> ) | 0.73       | 0.64, 0.84              |
| ACR (by 10 mg/gCr)                     | 0.99       | 0.97, 0.998             |
| Systolic blood pressure (by 10 mmHg)   | 0.93       | 0.85, 1.02              |

§NGSP, National Glycohemoglobin Standardization Program.

Note. Calculated by multiple logistic regression analysis in contradistinction to moderate lowering group (Group2).
