# Supplementary figures and images for: Conditions, pathogenesis, and progression of diabetic kidney disease and early decliner in Japan
Source: PubMed Central journal article supplement — BMJ Open Diabetes Res Care. 2020 Mar 22;8(1):e000902. doi: 10.1136/bmjdrc-2019-000902 (PMC7206926; doi:10.1136/bmjdrc-2019-000902), 2020-03-22

É °,Çä%°àò,Äë,Çâ,,Çâ,,Äü,,É°,,Ç§,,É§,,É°

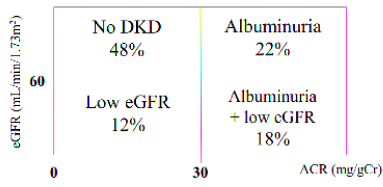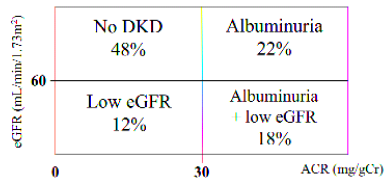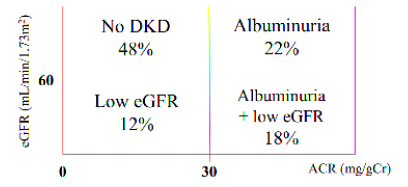

Supplement: bmjdrc-2019-000902supp003.pdf [file bmjdrc-2019-000902supp003.pdf]
